# Supplementary material for: ADAM15 correlates with prognosis, immune infiltration and apoptosis in hepatocellular carcinoma
Source: publisher site journal article supplement (doi:10.18632/aging.203425), 2021-08-23
Supplement: Supplementary file [file aging-v13i16-203425-supplementary-material-SD2.pdf]

## SUPPLEMENTARY TABLES

Supplementary Table 1. The list of immune checkpoint genes.

---

YTHDF1  
VTCN1  
TNFSF9  
TNFSF4  
TNFSF18  
TNFRSF9  
TNFRSF4  
TNFRSF18  
SIGLEC15  
PVR  
PTPRC  
PDCD1LG2  
PDCD1  
CD274  
LGALS9  
LDHC  
LDHB  
LDHA  
LAMA3  
LAG3  
JAK2  
JAK1  
IL23A  
IL12B  
IL12A  
IFNG  
ICOSLG  
ICOS  
HAVCR2  
FGL1  
CTLA4  
CD8A  
CD86  
CD80  
CD40LG  
CD40  
CD28  
B2M

---

**Supplementary Table 2. The list of siRNA and overexpression plasmid sequences.**

| <b>Gene</b>                      | <b>Forward 5'-3'</b>                                                   |
|----------------------------------|------------------------------------------------------------------------|
| siRNA sequences                  |                                                                        |
| siRNA1-ADAM15                    | CCCGAGTATTAGCTGTCTGG                                                   |
| siRNA2-ADAM15                    | GAATGTACGAGTGGCACTAG                                                   |
| siRNA3-ADAM15                    | AGTGCCACTCGTACATTCAG                                                   |
| overexpression plasmid sequences |                                                                        |
| pCAG-ADAM15                      | GACTACAAAGACCATGACGGTGATTATAAAGATCATGACATCGACTACAAGGATGAC<br>GATGACAAG |
| pEF1-ADAM15                      | GACTACAAAGACCATGACGGTGATTATAAAGATCATGACATCGACTACAAGGATGAC<br>GATGACAAG |
| pEnCMV-ADAM15                    | GACTACAAAGACCATGACGGTGATTATAAAGATCATGACATCGACTACAAGGATGAC<br>GATGACAAG |
